# Supplementary material for: Cancer nutritional-immunotherapy with NIR-II laser-controlled ATP release based on material repurposing strategy
Source: Royal Society of Chemistry journal article supplement (doi:10.1039/d4tb00288a), 2024-01-01
Supplement: d4tb00288a1.pdf [file d4tb00288a1.pdf]

## Supporting Information

### Cancer Nutritional-Immunotherapy with NIR-II Laser Controlled ATP Release Based on Material Repurposing Strategy

Jingsong Lu<sup>#\*</sup>, Yupei Wang<sup>#</sup>, Xiaohan Gao, Ying Li, Neema Ufurahi-Pambe, Abdul Fahad, Zeping Jin, Zhijun He, Zhenhu Guo, Wensheng Xie, Shi Wang, Xiaodan Sun, Xiumei Wang, Jing Yu, Shenglei Che, Guifeng Zhang, Yen Wei\* and Lingyun Zhao\*

\* Corresponding author

[lujingsong2022@mail.tsinghua.edu.cn](mailto:lujingsong2022@mail.tsinghua.edu.cn)

[weiyen@mail.tsinghua.edu.cn](mailto:weiyen@mail.tsinghua.edu.cn)

[lyzhao@mail.tsinghua.edu.cn](mailto:lyzhao@mail.tsinghua.edu.cn)

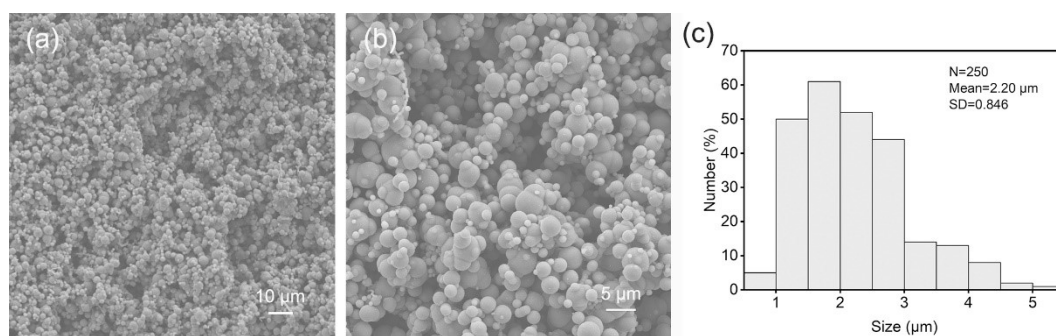

**Figure S1.** (a), (b) SEM images of CIP at different magnification. (c) The particle size of CIP determined from Figure S1b.

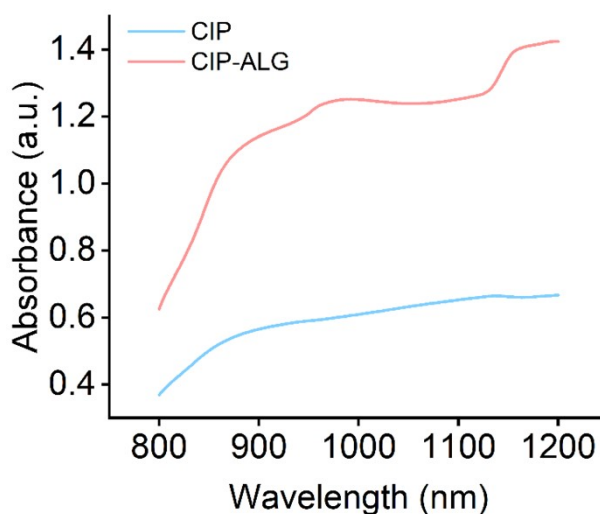

**Figure S2.** UV-vis-NIR spectrum of CIP and CIP-ALG.

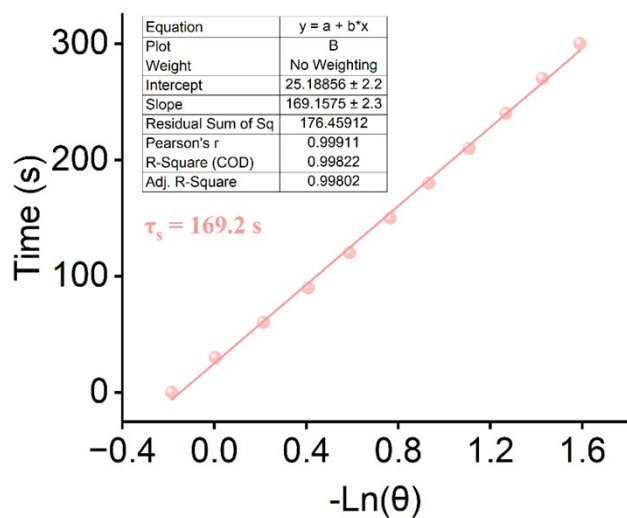

**Figure S3.** The curves of time constants obtained from Figure 1j.

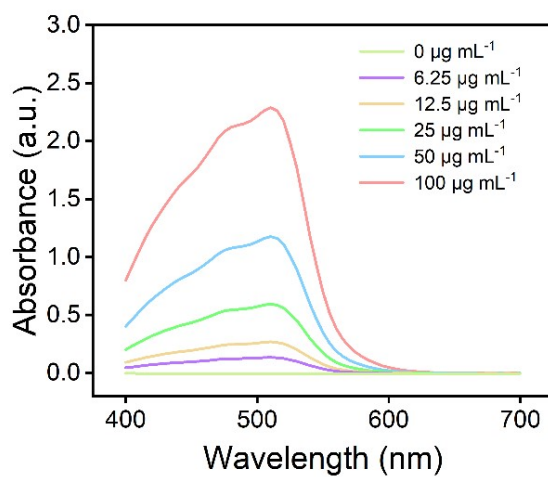

**Figure S4.** The standard curve of iron-phenanthroline complex determined by UV-vis spectrum.

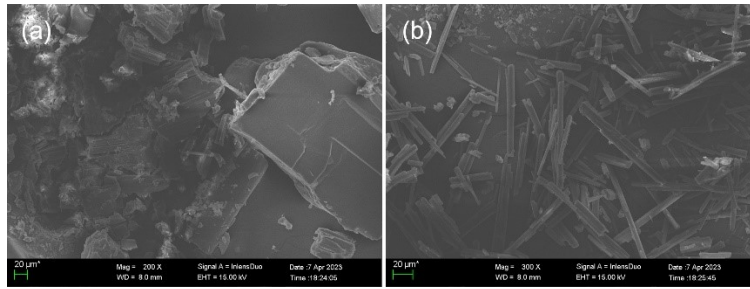

**Figure S5.** SEM images of ART (a) and DHA (b). Scale bar: 20 μm.

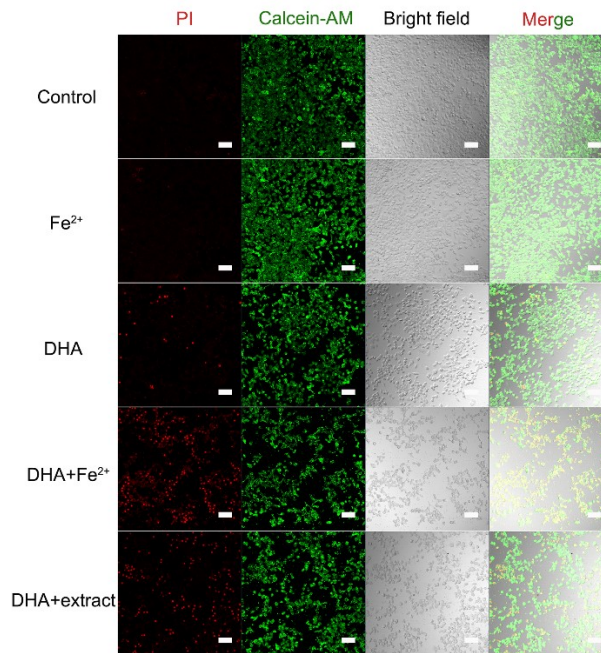

**Figure S6.** Calcein-AM/PI staining cells (green: alive, red: death) after different treatments (control, FeSO<sub>4</sub>, DHA, DHA+Fe<sup>2+</sup> and DHA+extract). Scale bar: 100 μm.

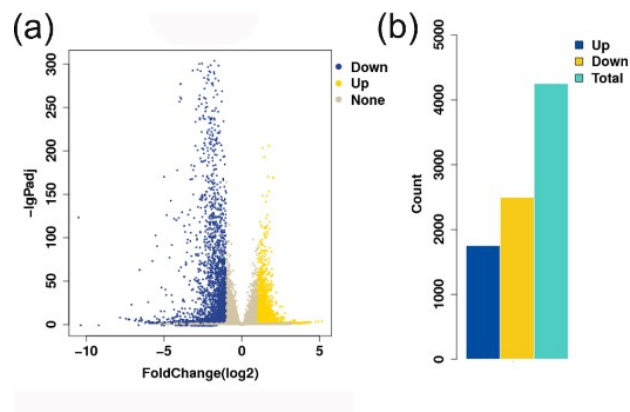

**Figure S7.** Venn diagram (a), the count of differentially expressed genes (b) between the control group and DHA+Extract group.

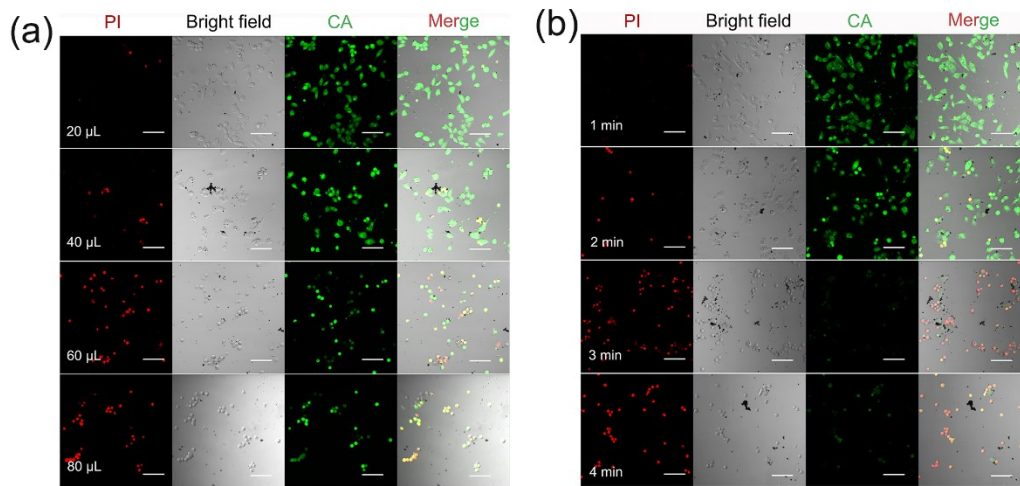

**Figure S8.** (a) Calcein-AM/PI staining cells treated with different volume of CIP-ALG under NIR-II irradiation. (b) Calcein-AM/PI staining cells treated with different irradiation time (1064 nm laser, 1, 2, 3 and 4 min). Scale bar: 100  $\mu\text{m}$ .

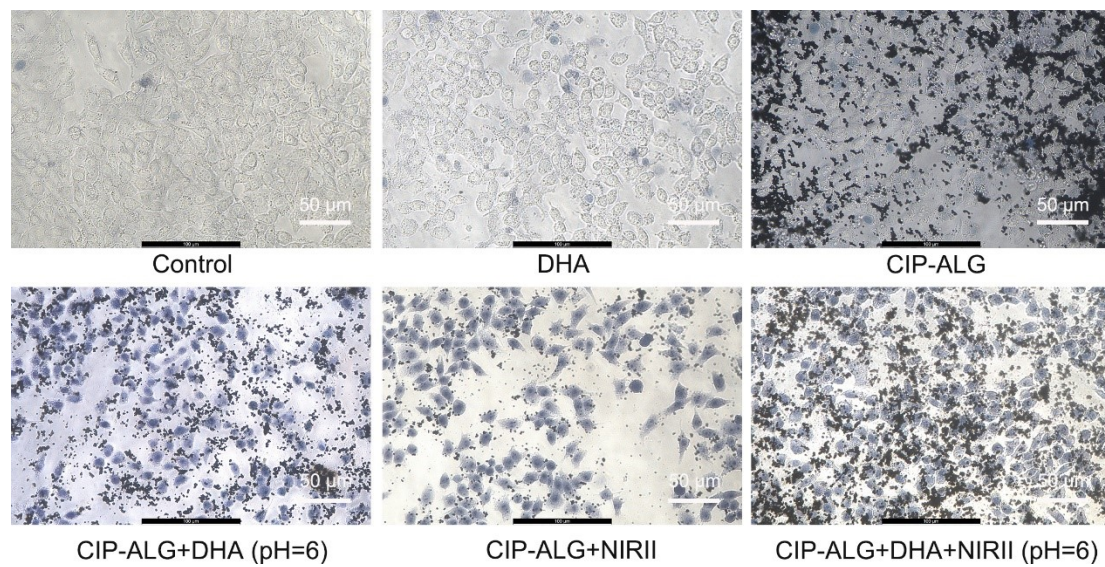

**Figure S9.** Trypan blue-staining 4T1 cells after different treatments (control, DHA, CIP-ALG, CIP-ALG+DHA and pH 6, CIP-ALG+NIR-II, CIP-ALG+DHA+NIR-II and pH 6). Scale bar: 50  $\mu\text{m}$ .



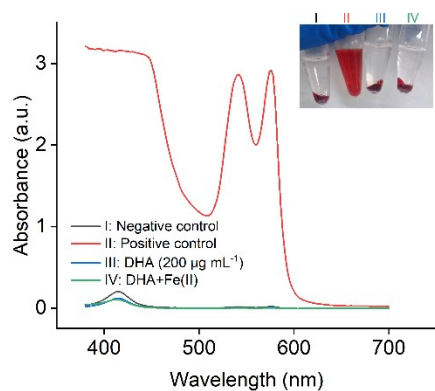

**Figure S10.** TUV-vis spectrum of erythrocyte supernatant after different treatments (PBS as negative control, DI water as positive control, DHA and DHA/FeSO<sub>4</sub>), the insert was the digital photo of erythrocyte supernatant after centrifugal (2000 rpm, 3 min).

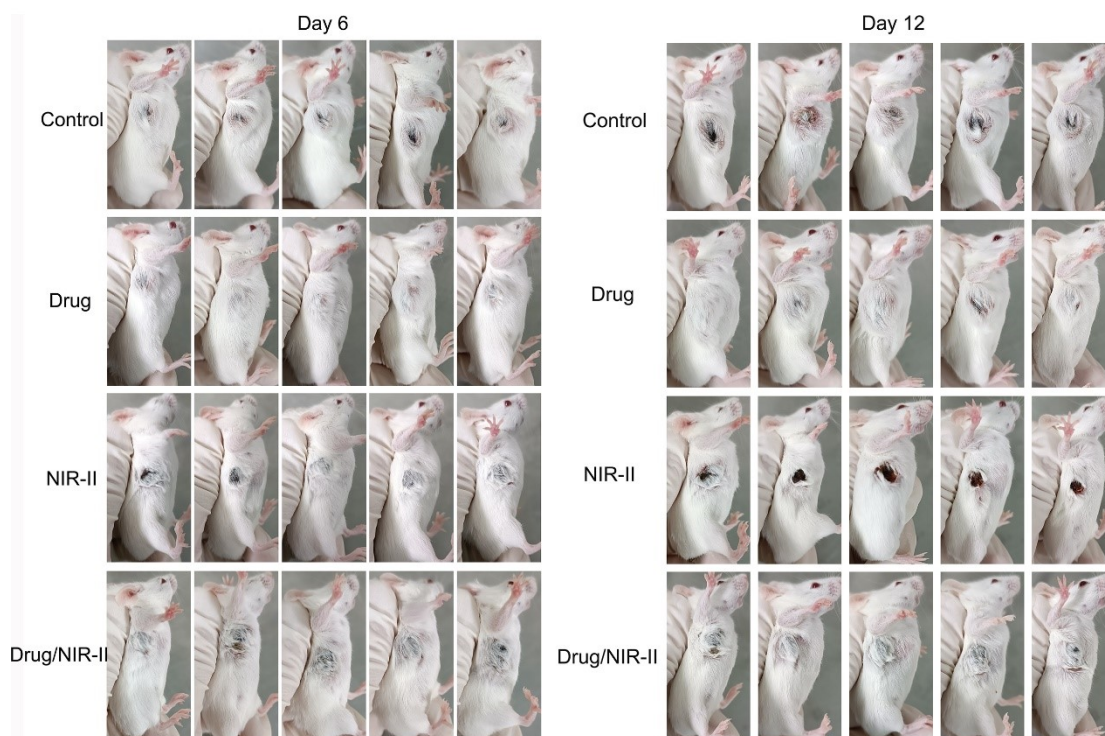

**Figure S11.** Digital photos of the tumor in each mouse on day 6 and 12.

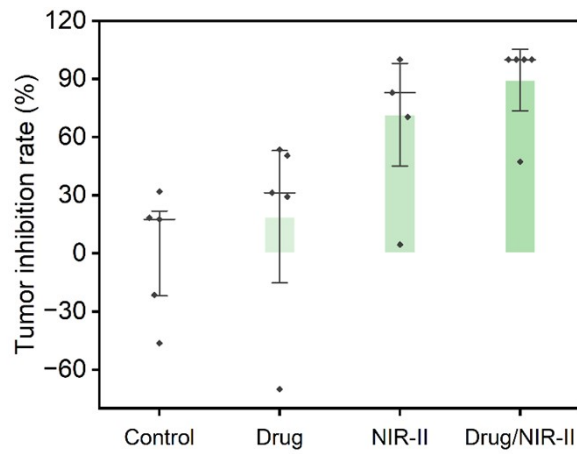

**Figure S12.** Tumor inhibition rate in different groups.

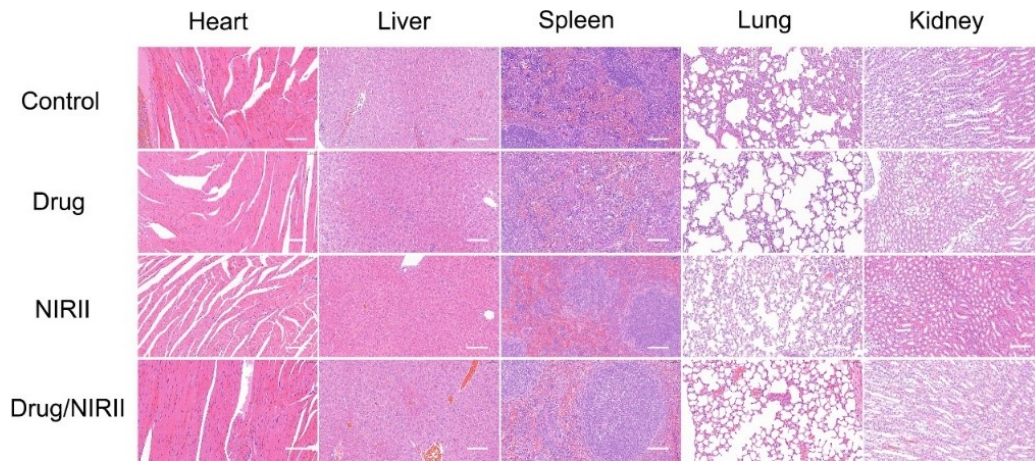

**Figure S13.** H&E staining major organs (heart, liver, spleen, lung and kidney) in different groups (control, drug, NIR-II and drug/NIR-II). Scale bar: 100  $\mu$ m.

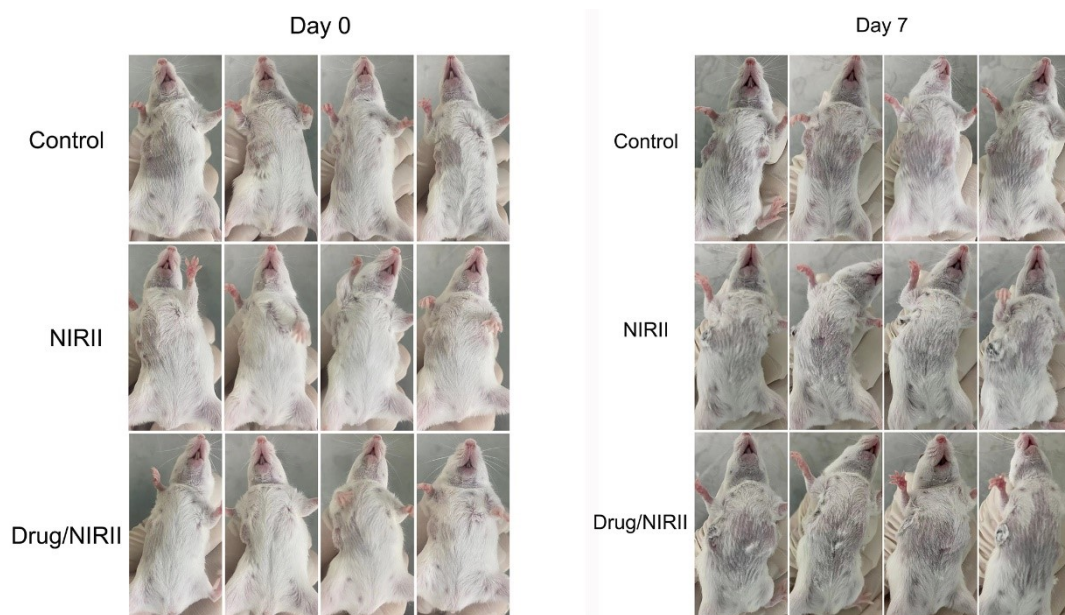

**Figure S14.** Digital photos of bilateral tumor in each mouse on day 0 and 7.

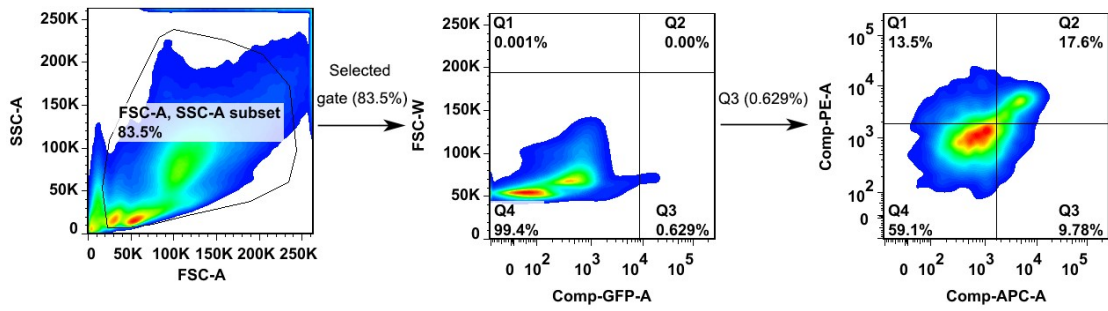

**Figure S15.** Flow cytometry analysis of the loop gate sequence for DC.

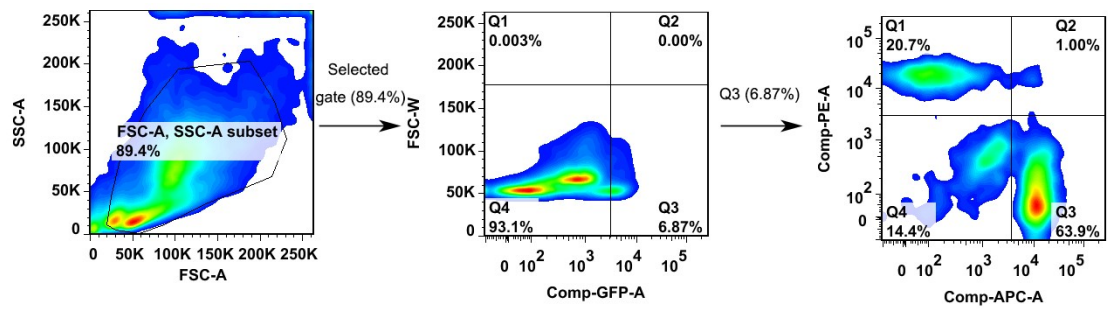

**Figure S16.** Flow cytometry analysis of the loop gate sequence for T cells.

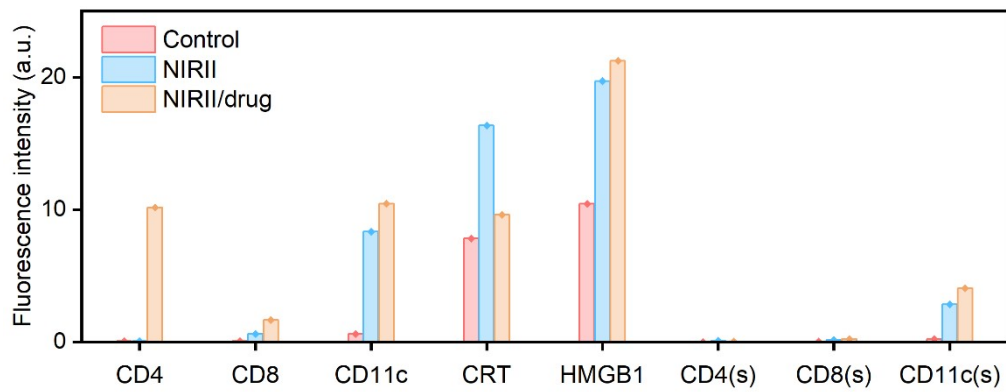

**Figure S17.** Fluorescence quantitative analysis for Figure 6 determined by Image J software.

**Table S1.** Inorganic NIR-II photothermal agents<sup>1</sup>.

| PTT agents                                                                    | Wavelength (nm) | Power (W cm <sup>-2</sup> ) | PCE (%)   | Cancer type | Dose (mg kg <sup>-1</sup> ) | Mouse strain |
|-------------------------------------------------------------------------------|-----------------|-----------------------------|-----------|-------------|-----------------------------|--------------|
| 9T-Graphene QDs                                                               | 1070            | 1.0                         | 33.45     | 4T1         | 10, i.v.                    | Balb/c       |
| 1N-Doping CDs                                                                 | 1064            | 0.6                         | 81.3      | 4T1         | 5, i.v.                     | Balb/c nude  |
| Bi@C NPs                                                                      | 1064            | 1.0                         | 43.2      | HeLa        | 3.2, i.v.                   | Kunming      |
| MOF-derived CNPs                                                              | 1064            | 1.0                         | 50.6      | MCF-7       | —                           | Balb/c nude  |
| H-SiO <sub>x</sub> NPs                                                        | 1064            | 0.6                         | 48.6      | 4T1         | 4 (Si), i.v.                | Balb/c       |
| MnO <sub>x</sub> @silicene-BSA                                                | 1064            | 1.5                         | 21.8      | 4T1         | 20, i.v.                    | Balb/c nude  |
| NIR-II-CD/BP hybrids                                                          | 808/1064        | 0.2/0.6                     | 49.5/28.4 | HeLa        | 6, i.v.                     | Balb/c nude  |
| CuS–Au heterostructures                                                       | 1064            | 1.0                         | 36.5      | 4T1         | 0.3, i.v.                   | Balb/c nude  |
| Pt spirals                                                                    | 1120            | 1.2                         | 52.5      | U14         | 0.66, i.v.                  | Kunming      |
| Au–Au nanocoral                                                               | 1060            | 0.8                         | 67.2      | HeLa        | 0.3, i.v.                   | Balb/c nude  |
| AuPBs                                                                         | 808/1064        | 0.33/1.0                    | 88.6/80.8 | 4T1         | 20, i.v.                    | Ncr nude     |
| Au <sub>3</sub> Cu nanocrystals                                               | 808/1064        | 1.0/0.8                     | 39.4/75.2 | KB          | 20, i.v.                    | Balb/c nude  |
| TA–Si–Au                                                                      | 1064            | 1.0                         | 24.1      | 4T1         | 5, i.t.                     | Balb/c       |
| Au NSs                                                                        | 785/1064        | 0.39/1.0                    | 34.5/13.0 | A549        | —                           | —            |
| Ti <sub>2</sub> N QDs                                                         | 808/1064        | 1.0                         | 48.6/45.5 | 4T1/U87     | 20, i.v.                    | Balb/c       |
| Nb <sub>2</sub> C (MXene)                                                     | 808/1064        | 1.0/1.0                     | 36.4/45.6 | U87/4T1     | 20, i.v.                    | Kunming      |
| TeO <sub>2</sub> /(NH <sub>4</sub> ) <sub>x</sub> WO <sub>3</sub> nanoribbons | 1064            | 1.0                         | 43.6      | MCF-7/A549  | 20, i.v.                    | Balb/c nude  |
| V <sub>2</sub> C QDs                                                          | 1064            | 0.96                        | 45.0      | MCF-7       | 10, i.v.                    | Balb/c nude  |
| Ni <sub>9</sub> S <sub>8</sub> NP                                             | 808/1064        | 0.33/1.0                    | 70.9/46.0 | HeLa        | 2.4, i.v.                   | Balb/c nude  |
| Ti <sub>2</sub> O <sub>3</sub> @HA                                            | 1064            | 0.8                         | 50.2      | HepG2       | 20, i.v.                    | Balb/c nude  |
| CS–RuO <sub>2</sub> NPs                                                       | 1064            | 1.0                         | 52.5      | MCF-7       | 2, i.t.                     | Balb/c nude  |
| MoO <sub>2</sub> NPs                                                          | 808/1064        | 0.33/1.0                    | 52.9/55.6 | A549        | 1, i.v.                     | Balb/c nude  |
| MoSi <sub>2</sub> NPs                                                         | 1064            | 1.5                         | 34.4      | HepG2       | 5, i.v.                     | Balb/c nude  |
| WN nanosheets hydrogel                                                        | 1064            | 1.0                         | 29.5      | 4T1         | —                           | —            |
| EGaIn @SiO <sub>2</sub> -RGD NPs                                              | 1064            | 1.5                         | 22.43     | U87         | 10, i.v.                    | Balb/c nude  |
| Sb-Doped SnO <sub>2</sub> NPs                                                 | 1064            | 1.0                         | 48.3      | HeLa        | 1, i.t.                     | Balb/c nude  |
| SnSe–PVP nanorods                                                             | 808/1064        | 1.5/1.5                     | 37.3/20.3 | 4T1         | 40 (Se), i.v.               | Balb/c       |

**Reference**

1. C. Xu and K. Pu, *Chemical Society Reviews*, 2021, **50**, 1111-1137.
